# Supplementary material for: A new Ru,Ru,Pt supramolecular architecture for photocatalytic H2 production
Source: Royal Society of Chemistry journal article supplement (doi:10.1039/c5cc06463e), 2015-01-01
Supplement: c5cc06463e1.pdf [file c5cc06463e1.pdf]

## Supporting Information

### **A New Ru,Ru,Pt Supramolecular Architecture for Photocatalytic H<sub>2</sub> Production**

*Jessica Knoll White\* and Karen J. Brewer*

---

Department of Chemistry  
Virginia Tech  
Blacksburg, VA 24061 (USA)  
E-mail: knoll.56@osu.edu

## Table of Contents

| <b>Content</b>                                       | <b>Page</b> |
|------------------------------------------------------|-------------|
| Cover Page                                           | 1           |
| Table of Contents                                    | 2           |
| Experimental Section                                 | 3           |
| Electrochemistry                                     | 6           |
| Electronic Absorption Spectroscopy                   | 8           |
| Steady-State and Time-Resolved Emission Spectroscopy | 10          |
| Photocatalytic H <sub>2</sub> Production             | 12          |
| Three Dimensional Models                             | 13          |
| References                                           | 13          |

## EXPERIMENTAL SECTION

**Materials:** All materials were used as received unless otherwise stated. The precursors *cis*-[PtCl<sub>2</sub>(DMSO)<sub>2</sub>], [(Ph<sub>2</sub>phen)<sub>2</sub>Ru(dpp)](PF<sub>6</sub>)<sub>2</sub>, and *cis,cis*-[(bpy)RuCl<sub>2</sub>(DMSO)<sub>2</sub>] and the ligand 2,3-bis(2-pyridyl)quinoxaline (dpq), were synthesized by previously reported methods.<sup>[1]</sup> Ruthenium(III) trichloride trihydrate (RuCl<sub>3</sub>•3H<sub>2</sub>O), 2,2'-bipyridine (bpy), 4,7-diphenyl-1,10-phenanthroline (Ph<sub>2</sub>phen), trifluoromethanesulfonic acid (HSO<sub>3</sub>CF<sub>3</sub>), silver trifluoromethanesulfonate (AgSO<sub>3</sub>CF<sub>3</sub>), lithium chloride (LiCl), and tetra-*n*-butylammonium chloride (Bu<sub>4</sub>NCl) were purchased from Alfa Aesar. Sephadex® LH-20, *N,N*-dimethylaniline (DMA), and 2,3-bis(2-pyridyl)pyrazine (dpp) were received from Aldrich Chemical Company. Tetra-*n*-butylammonium hexafluorophosphate (Bu<sub>4</sub>NPF<sub>6</sub>) was purchased from Fluka. Ammonium hexafluorophosphate (NH<sub>4</sub>PF<sub>6</sub>) and tetrakis(dimethylsulfoxide)dichlororuthenium(II) (*cis*-[Ru(DMSO)<sub>4</sub>Cl<sub>2</sub>]) were purchased from Strem Chemicals, Inc. Ethanol (EtOH) was received from Decon Labs. Spectral grade acetonitrile (CH<sub>3</sub>CN) was purchased from Burdick and Jackson. CH<sub>3</sub>CN, toluene, diethyl ether (Et<sub>2</sub>O), ethylene glycol, and 80-200 mesh alumina were purchased from Fisher Scientific.

### Synthesis:

**[(Ph<sub>2</sub>phen)<sub>2</sub>Ru(dpp)RuCl<sub>2</sub>(bpy)](PF<sub>6</sub>)<sub>2</sub>** was synthesized by heating at reflux [(Ph<sub>2</sub>phen)<sub>2</sub>Ru(dpp)](PF<sub>6</sub>)<sub>2</sub> (0.30 g, 0.39 mmol) and excess *cis,cis*-[(bpy)RuCl<sub>2</sub>(DMSO)<sub>2</sub>] (0.39 g, 0.80 mmol) in 40 mL of EtOH for 16 h. The reaction mixture was cooled to RT followed by addition of 0.5 g of NH<sub>4</sub>PF<sub>6</sub>. The precipitate was collected by vacuum filtration and washed with 100 mL of H<sub>2</sub>O. Purification was achieved by Sephadex® LH-20 size exclusion chromatography (2.2 cm x 100 cm) utilizing a 2:1 EtOH/CH<sub>3</sub>CN mobile phase. The green-brown product that eluted first was collected and the solvent was removed under vacuum. The product was dissolved in minimal CH<sub>3</sub>CN (5 mL) and added dropwise to 300 mL of Et<sub>2</sub>O by syringe filtration. The green-brown precipitate was collected by vacuum filtration, washed with 60 mL of Et<sub>2</sub>O and dried under vacuum (0.29 g, 0.18 mmol, yield = 45 %). (+)ESI-MS: [M-PF<sub>6</sub>]<sup>+</sup>, *m/z* = 1473.14, [M-2PF<sub>6</sub>]<sup>2+</sup>, *m/z* = 664.09.

**[(Ph<sub>2</sub>phen)<sub>2</sub>Ru(dpp)Ru(bpy)(dpp)](PF<sub>6</sub>)<sub>4</sub>** was synthesized by heating at reflux [(Ph<sub>2</sub>phen)<sub>2</sub>Ru(dpp)RuCl<sub>2</sub>(bpy)](PF<sub>6</sub>)<sub>2</sub> (0.30 g, 0.19 mmol) and two equivalents of AgSO<sub>3</sub>CF<sub>3</sub> (0.97 g, 0.38 mmol) in 30 mL of EtOH for 2 h to remove Cl<sup>-</sup> ligands. The hot reaction mixture was then added to a hot, stirring solution of dpp (0.3 g, 1.2 mmol) in 20 mL of ethylene glycol and the mixture was heated at reflux for 16 h. The reaction mixture was then cooled to RT and 0.075 g of Bu<sub>4</sub>NCl was added and stirred for 30 minutes to precipitate Ag<sup>+</sup> as AgCl. Excess NH<sub>4</sub>PF<sub>6</sub> (0.5 g) was added and the precipitate was collected by vacuum filtration and washed with 50 mL of H<sub>2</sub>O. Purification was achieved by Sephadex® LH-20 size exclusion chromatography (2.2 cm x 100 cm) with a 2:1 EtOH/CH<sub>3</sub>CN mobile phase. The red-purple product that eluted first was collected and the solvent was removed under vacuum. The product was dissolved in minimal CH<sub>3</sub>CN (5 mL) and added dropwise to 300 mL of Et<sub>2</sub>O by syringe filtration. The red precipitate was collected by vacuum filtration, washed with 60 mL of Et<sub>2</sub>O, and dried under vacuum (0.23 g, 0.11 mmol, yield = 60 %). (+)ESI-MS: [M-PF<sub>6</sub>]<sup>+</sup>, *m/z* = 1927.21, [M-2PF<sub>6</sub>]<sup>2+</sup>, *m/z* = 890.73, [M-3PF<sub>6</sub>]<sup>3+</sup>, *m/z* = 545.76.

**[(Ph<sub>2</sub>phen)<sub>2</sub>Ru(dpp)Ru(bpy)(dpq)](PF<sub>6</sub>)<sub>4</sub>** was synthesized and purified following the procedure used for [(Ph<sub>2</sub>phen)<sub>2</sub>Ru(dpp)Ru(bpy)(dpp)](PF<sub>6</sub>)<sub>4</sub> by substituting dpq (0.33 g, 1.2 mmol) in the second step, producing a dark purple-red color precipitate (0.21 g, 0.10 mmol, yield = 55 %). (+)ESI-MS: [M-2PF<sub>6</sub>]<sup>2+</sup>, *m/z* = 890.73.

**[(Ph<sub>2</sub>phen)<sub>2</sub>Ru(dpp)Ru(bpy)(dpp)PtCl<sub>2</sub>](PF<sub>6</sub>)<sub>4</sub>** was synthesized by heating at reflux a mixture of [(Ph<sub>2</sub>phen)<sub>2</sub>Ru(dpp)Ru(bpy)(dpp)](PF<sub>6</sub>)<sub>4</sub> (0.10 g, 0.048 mmol) and excess *cis*-[PtCl<sub>2</sub>(DMSO)<sub>2</sub>] (0.10 g, 0.24 mmol) in 30 mL EtOH for 4 h. The reaction mixture was cooled to RT and 0.5 g of NH<sub>4</sub>PF<sub>6</sub> was added. The precipitate was collected by vacuum filtration and washed with 60 mL of H<sub>2</sub>O. The product

was dissolved in minimal CH<sub>3</sub>CN (5 mL) and added dropwise to 300 mL of Et<sub>2</sub>O by syringe filtration to remove Pt<sup>0</sup> particles. The red precipitate was collected by vacuum filtration, washed with 50 mL of Et<sub>2</sub>O and dried under vacuum (0.11 g, 0.046 mmol, yield = 95 %). (+)ESI-MS: [M–PF<sub>6</sub>]<sup>+</sup>, *m/z* = 2193.11, [M–2PF<sub>6</sub>]<sup>2+</sup>, *m/z* = 1024.07, [M–3PF<sub>6</sub>]<sup>3+</sup>, *m/z* = 634.07.

[(Ph<sub>2</sub>phen)<sub>2</sub>Ru(dpp)Ru(bpy)(dpq)PtCl<sub>2</sub>](PF<sub>6</sub>)<sub>4</sub> was synthesized and purified following the procedure used for [(Ph<sub>2</sub>phen)<sub>2</sub>Ru(dpp)Ru(bpy)(dpp)PtCl<sub>2</sub>](PF<sub>6</sub>)<sub>4</sub> by substituting [(Ph<sub>2</sub>phen)<sub>2</sub>Ru(dpp)Ru(bpy)(dpq)](PF<sub>6</sub>)<sub>4</sub> (0.10 g, 0.047 mmol), producing a dark purple-red precipitate (0.11 g, 0.045 mmol, yield = 95 %). (+)ESI-MS: [M–2PF<sub>6</sub>]<sup>2+</sup>, *m/z* = 1049.08, [M–3PF<sub>6</sub>]<sup>3+</sup>, *m/z* = 651.07.

**Mass spectrometry:** Positive ion electrospray ionization mass spectrometry, (+)ESI-MS, experiments were performed using an Agilent Technologies 6220 Accurate-Mass time-of-flight (TOF) instrument with a dual ESI source. Samples were dissolved in HPLC grade CH<sub>3</sub>CN. Isotopic distribution patterns were simulated with Sheffield Chemputer<sup>[2]</sup> (REF) and compared to the observed molecular ion peaks.

**Electrochemistry:** Cyclic voltammetry (CV) and square wave voltammetry (SWV) were performed with an Epsilon potentiostat from Bioanalytical Systems, Inc. using a one compartment, three electrode cell with a glassy carbon working electrode, silver wire pseudo reference electrode, and a platinum wire auxiliary electrode. Ferrocene was added to the sample as an internal standard (FcCp<sub>2</sub><sup>+</sup>/FcCp<sub>2</sub> = 0.46 V vs. Ag/AgCl(3 M NaCl)) following electrochemical analysis. The working electrode was polished with 0.5 μm alumina paste prior to each experiment. The metal complex was dissolved in an CH<sub>3</sub>CN electrolyte solution containing 0.1 M Bu<sub>4</sub>NPF<sub>6</sub> which was deoxygenated by bubbling with Ar for 10 minutes. CV studies were performed at a scan rate of 0.1 V/s. SWV studies were performed with pulse frequency (τ) = 15 Hz, pulse time (t<sub>p</sub>) = 30 ms, fixed pulse potential magnitude (ΔE<sub>p</sub>) = 25 mV, and potential step (ΔE<sub>s</sub>) = 4 mV.

**Electronic absorption spectroscopy:** Electronic absorption spectra were collected using an Agilent 8453 diode array UV-Vis spectrophotometer with a spectral range of 190 to 1100 nm and 1 nm resolution. Samples were dissolved in RT spectral grade CH<sub>3</sub>CN and measured in a 1 cm or 0.2 cm quartz cuvette (Starna Cells, Inc.; Atascadero, CA, USA). Extinction coefficient experiments were performed in triplicate. Solutions were prepared gravimetrically.

**Steady-state and time-resolved emission spectroscopy:** Steady-state emission was measured using a QuantaMaster Model QM-200-45E fluorimeter (Figure 2.4A) from Photon Technologies International, Inc. The excitation source was a 150 W Xe arc lamp that was cooled by water circulation. The emission was collected at a 90° angle with a thermoelectrically cooled Hamamatsu 1527 photomultiplier tube (PMT) in photon counting mode with a 0.25 nm resolution. The monochromator used Czerny-Turner style grating set to 1200 lines/mm and 750 nm blaze. The slit widths for the excitation and emission monochromators were adjusted to 1.5 mm (± 6 nm). The sample was dissolved in RT spectral grade CH<sub>3</sub>CN with an absorbance ca. 0.3 at the chosen excitation wavelength. The solutions were deoxygenated by bubbling with Ar for 10 minutes prior to analysis. Recorded spectra were an average of three scans unless otherwise stated. The quantum yields of emission (Φ<sup>em</sup>) were calculated using [Os(bpy)<sub>3</sub>](PF<sub>6</sub>)<sub>2</sub> as a standard (Φ<sup>em</sup> = 0.0046 in RT deoxygenated CH<sub>3</sub>CN).<sup>[3]</sup> 77 K emission spectra were obtained by dissolving the sample in 4:1 EtOH/MeOH in an NMR tube and slowly immersing the sample in a liquid N<sub>2</sub> finger dewar. All emission spectra were corrected for PMT response. Time-resolved emission spectroscopy measurements were performed using a Photon Technologies International, Inc. PL-2300 N<sub>2</sub> laser with a PL-201 tunable dye laser. An emission monochromator was set to the maximum emission wavelength determined by steady-state emission measurements. A Hamamatsu R928 PMT operating in direct analog mode collected the time profile at a 90° angle relative to the excitation source. The signal was displayed on a LeCroy 9361 Dual 300 MHz oscilloscope (2.5 Gs/s). The data were applied to an exponential decay function, **Equation S1**,

$$I(t) = \sum_i \alpha_i e^{\frac{-t}{\tau_i}} \quad (\text{S1})$$

where  $I(t)$  is the intensity of the signal at time  $t$  after the laser pulse,  $\sum_i \alpha_i$  is the sum of the fractions that are contributed by each component to the overall observed decay,  $i$  is the component, and  $\tau_i$  is the excited state lifetime of each component. The signals measured as potential (V) were graphed versus time, and a plot of  $\ln(V)$  versus time yields a straight line with a slope that corresponds to  $\tau^{-1}$ . The solutions were deoxygenated by bubbling with Ar for 10 minutes prior to analysis.

**Photocatalytic H<sub>2</sub> production:** H<sub>2</sub> production experiments were performed using a locally designed LED array.<sup>[4]</sup> The light sources were blue Luxeon® V Star LEDs with a spectral coverage of  $470 \pm 10$  nm. The chemical actinometer K<sub>3</sub>[Fe(C<sub>2</sub>O<sub>4</sub>)<sub>3</sub>] (potassium ferrioxalate) was used to determine the light flux of the LEDs. The calculated flux of  $2.3 \pm 0.1 \times 10^{19}$  photons/min was the average of three experiments. HY-OPTIMA™ 700 in-line process H<sub>2</sub> sensors from H2scan (Valencia, CA) were used to quantify H<sub>2</sub> production in real time. The sensors were calibrated periodically to ensure accurate H<sub>2</sub> readings. Glass photolysis reaction cells were designed and manufactured locally. The septum-capped cells were tightly attached to the H<sub>2</sub> sensor, and air was removed from the system with an Ar flow for 30 minutes. The metal complex stock solution in spectral grade CH<sub>3</sub>CN and H<sub>2</sub>O acidified to pH 2 with HSO<sub>3</sub>CF<sub>3</sub> were injected into the reaction cells. The solution was deoxygenated by bubbling with Ar for 15 minutes. DMA was deoxygenated separately and injected into the cell immediately prior to photolysis. The total volume of the solution was 4.5 mL, and the headspace volume was 15.3 mL. The LEDs were turned on to begin photolysis directly after injection of DMA. The evolution of H<sub>2</sub> was monitored in real time using MOXA Pcomm Lite terminal emulator software. The % H<sub>2</sub> output was converted to moles of H<sub>2</sub>, and the TON (turnover number) of the catalyst was calculated using **Equation S2**.

$$TON = \frac{\text{moles of } H_2 \text{ produced}}{\text{moles of catalyst}} \quad (\text{S2})$$

The quantum yield of H<sub>2</sub> production at time  $t$  was calculated using **Equation S3**.

$$\Phi_{H_2}(t) = \frac{\text{moles of } H_2 \text{ produced}}{\text{moles of incident photons}} \times 2 \quad (\text{S3})$$

The moles of incident photons were calculated using the light flux. The ratio of moles of H<sub>2</sub> produced and the moles of incident photons was multiplied by two due to the need for two photons to produce one H<sub>2</sub> molecule. Experiments were performed in triplicate.

## ELECTROCHEMISTRY

**Table S1.** Electrochemical Data for the  $[(\text{Ph}_2\text{phen})_2\text{Ru}(\text{dpp})\text{RuCl}_2(\text{bpy})](\text{PF}_6)_2$ ,  $[(\text{Ph}_2\text{phen})_2\text{Ru}(\text{dpp})\text{Ru}(\text{bpy})(\text{BL})](\text{PF}_6)_4$ ,  $[(\text{Ph}_2\text{phen})_2\text{Ru}(\text{dpp})\text{Ru}(\text{bpy})(\text{BL})\text{PtCl}_2](\text{PF}_6)_4$ ,  $[\{(\text{Ph}_2\text{phen})_2\text{Ru}(\text{dpp})\}_2\text{RuCl}_2](\text{PF}_6)_4$ ,  $[\{(\text{Ph}_2\text{phen})_2\text{Ru}(\text{dpp})\}_2\text{Ru}(\text{BL})](\text{PF}_6)_6$ , and  $[\{(\text{Ph}_2\text{phen})_2\text{Ru}(\text{dpp})\}_2\text{Ru}(\text{BL})\text{PtCl}_2](\text{PF}_6)_6$  Complexes<sup>a</sup>

| Complex                                                                                                          | $E_{1/2}$ (V vs. Ag/AgCl)                               |                                                         |                                                |                                                                                |
|------------------------------------------------------------------------------------------------------------------|---------------------------------------------------------|---------------------------------------------------------|------------------------------------------------|--------------------------------------------------------------------------------|
|                                                                                                                  | Oxidation (assignment) <sup>b</sup>                     |                                                         | Reduction (assignment) <sup>c</sup>            |                                                                                |
| $[(\text{Ph}_2\text{phen})_2\text{Ru}(\text{dpp})\text{RuCl}_2(\text{bpy})](\text{PF}_6)_2$                      | 0.66 ( $\text{Ru}^{\text{II/III}}$ )                    | 1.58 ( <b><math>\text{Ru}^{\text{II/III}}</math></b> )  | −0.80 ( $\text{dpp}^{0/-}$ )                   |                                                                                |
| $[(\text{Ph}_2\text{phen})_2\text{Ru}(\text{dpp})\text{Ru}(\text{bpy})(\text{dpp})](\text{PF}_6)_4$              | 1.53 ( <b><math>\text{Ru}^{\text{II/III}}</math></b> )  |                                                         | −0.54 ( $\text{dpp}^{0/-}$ )                   | −1.00 ( <b><math>\text{dpp}^{0/-}</math></b> )                                 |
| $[(\text{Ph}_2\text{phen})_2\text{Ru}(\text{dpp})\text{Ru}(\text{bpy})(\text{dpq})](\text{PF}_6)_4$              | 1.54 ( <b><math>\text{Ru}^{\text{II/III}}</math></b> )  |                                                         | −0.49 ( $\text{dpp}^{0/-}$ )                   | −0.77 ( <b><math>\text{dpq}^{0/-}</math></b> )                                 |
| $[(\text{Ph}_2\text{phen})_2\text{Ru}(\text{dpp})\text{Ru}(\text{bpy})(\text{dpp})\text{PtCl}_2](\text{PF}_6)_4$ | 1.54 ( <b><math>\text{Ru}^{\text{II/III}}</math></b> )  |                                                         | −0.39 ( <b><math>\text{dpp}^{0/-}</math></b> ) | −0.60 ( $\text{dpp}^{0/-}$ )                                                   |
| $[(\text{Ph}_2\text{phen})_2\text{Ru}(\text{dpp})\text{Ru}(\text{bpy})(\text{dpq})\text{PtCl}_2](\text{PF}_6)_4$ | 1.55 ( <b><math>\text{Ru}^{\text{II/III}}</math></b> )  |                                                         | −0.08 ( <b><math>\text{dpq}^{0/-}</math></b> ) | −0.60 ( $\text{dpp}^{0/-}$ )                                                   |
| $[\{(\text{Ph}_2\text{phen})_2\text{Ru}(\text{dpp})\}_2\text{RuCl}_2](\text{PF}_6)_4$                            | 0.86 ( $\text{Ru}^{\text{II/III}}$ )                    | 1.59 (2 <b><math>\text{Ru}^{\text{II/III}}</math></b> ) | −0.68 ( $\text{dpp}^{0/-}$ )                   | −0.81 ( $\text{dpp}^{0/-}$ )                                                   |
| $[\{(\text{Ph}_2\text{phen})_2\text{Ru}(\text{dpp})\}_2\text{Ru}(\text{dpp})](\text{PF}_6)_6$                    | 1.55 (2 <b><math>\text{Ru}^{\text{II/III}}</math></b> ) |                                                         | −0.45 ( $\text{dpp}^{0/-}$ )                   | −0.60 ( $\text{dpp}^{0/-}$ )    −1.02 ( <b><math>\text{dpp}^{0/-}</math></b> ) |
| $[\{(\text{Ph}_2\text{phen})_2\text{Ru}(\text{dpp})\}_2\text{Ru}(\text{dpq})](\text{PF}_6)_6$                    | 1.55 (2 <b><math>\text{Ru}^{\text{II/III}}</math></b> ) |                                                         | −0.42 ( $\text{dpp}^{0/-}$ )                   | −0.58 ( $\text{dpp}^{0/-}$ )    −0.79 ( <b><math>\text{dpq}^{0/-}</math></b> ) |
| $[\{(\text{Ph}_2\text{phen})_2\text{Ru}(\text{dpp})\}_2\text{Ru}(\text{dpp})\text{PtCl}_2](\text{PF}_6)_6$       | 1.56 (2 <b><math>\text{Ru}^{\text{II/III}}</math></b> ) |                                                         | −0.33 ( <b><math>\text{dpp}^{0/-}</math></b> ) | −0.53 ( $\text{dpp}^{0/-}$ )    −0.64 ( $\text{dpp}^{0/-}$ )                   |
| $[\{(\text{Ph}_2\text{phen})_2\text{Ru}(\text{dpp})\}_2\text{Ru}(\text{dpq})\text{PtCl}_2](\text{PF}_6)_6$       | 1.57 (2 <b><math>\text{Ru}^{\text{II/III}}</math></b> ) |                                                         | −0.02 ( <b><math>\text{dpq}^{0/-}</math></b> ) | −0.50 ( $\text{dpp}^{0/-}$ )    −0.65 ( $\text{dpp}^{0/-}$ )                   |

<sup>a</sup> Measurements recorded in deoxygenated  $\text{CH}_3\text{CN}$  at RT with 0.1 M  $\text{Bu}_4\text{NPF}_6$  electrolyte.  $\text{Ph}_2\text{phen}$  = 4,7-diphenyl-1,10-phenanthroline,  $\text{bpy}$  = 2,2'-bipyridine,  $\text{dpp}$  = 2,3-bis(2-pyridyl)pyrazine,  $\text{dpq}$  = 2,3-bis(2-pyridyl)quinoxaline. Potentiostat resolution is  $\pm 10$  mV. <sup>b</sup> Bold indicates terminal Ru. <sup>c</sup> Bold indicates BL.

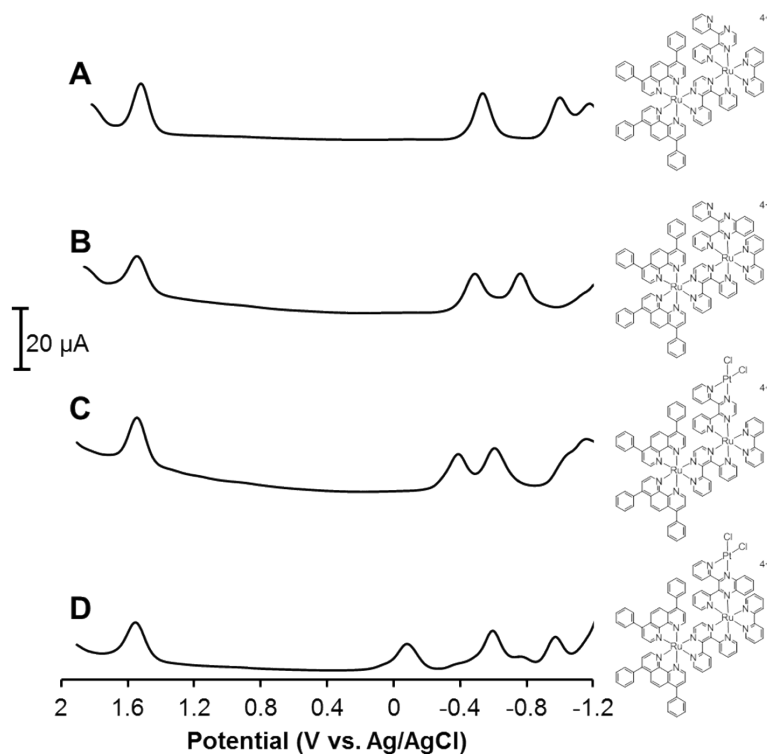

**Figure S1.** Square wave voltammograms of A)  $[(\text{Ph}_2\text{phen})_2\text{Ru}(\text{dpp})\text{Ru}(\text{bpy})(\text{dpp})](\text{PF}_6)_4$ , B)  $[(\text{Ph}_2\text{phen})_2\text{Ru}(\text{dpp})\text{Ru}(\text{bpy})(\text{dpq})](\text{PF}_6)_4$ , C)  $[(\text{Ph}_2\text{phen})_2\text{Ru}(\text{dpp})\text{Ru}(\text{bpy})(\text{dpp})\text{PtCl}_2](\text{PF}_6)_4$ , and D)  $[(\text{Ph}_2\text{phen})_2\text{Ru}(\text{dpp})\text{Ru}(\text{bpy})(\text{dpq})\text{PtCl}_2](\text{PF}_6)_4$  measured in deoxygenated RT  $\text{CH}_3\text{CN}$  with 0.1 M  $\text{Bu}_4\text{NPF}_6$  supporting electrolyte in a one compartment, three electrode cell with a glassy carbon working electrode, Ag/AgCl reference electrode, and a platinum wire auxiliary electrode.

## ELECTRONIC ABSORPTION SPECTROSCOPY

**Table S2.** Electronic Absorption Spectroscopic Data for the  $[(\text{Ph}_2\text{phen})_2\text{Ru}(\text{dpp})\text{RuCl}_2(\text{bpy})](\text{PF}_6)_2$ ,  $[(\text{Ph}_2\text{phen})_2\text{Ru}(\text{dpp})\text{Ru}(\text{bpy})(\text{BL})](\text{PF}_6)_4$ ,  $[(\text{Ph}_2\text{phen})_2\text{Ru}(\text{dpp})\text{Ru}(\text{bpy})(\text{BL})\text{PtCl}_2](\text{PF}_6)_4$ ,  $[\{(\text{Ph}_2\text{phen})_2\text{Ru}(\text{dpp})\}_2\text{RuCl}_2](\text{PF}_6)_4$ ,  $[\{(\text{Ph}_2\text{phen})_2\text{Ru}(\text{dpp})\}_2\text{Ru}(\text{BL})](\text{PF}_6)_6$ , and  $[\{(\text{Ph}_2\text{phen})_2\text{Ru}(\text{dpp})\}_2\text{Ru}(\text{BL})\text{PtCl}_2](\text{PF}_6)_6$  Complexes <sup>a</sup>

| Complex                                                                                                          | $\lambda_{\text{max}}^{\text{abs}}$ (nm) | $\epsilon \times 10^{-4}$ ( $\text{M}^{-1}\text{cm}^{-1}$ ) | Assignment                                                                                                                       |
|------------------------------------------------------------------------------------------------------------------|------------------------------------------|-------------------------------------------------------------|----------------------------------------------------------------------------------------------------------------------------------|
| $[(\text{Ph}_2\text{phen})_2\text{Ru}(\text{dpp})\text{RuCl}_2(\text{bpy})](\text{PF}_6)_2$                      | 278                                      | 11                                                          | $\text{Ph}_2\text{phen } \pi \rightarrow \pi^*$ , $\text{bpy } \pi \rightarrow \pi^*$                                            |
|                                                                                                                  | 326 (sh)                                 | 3.7                                                         | $\text{dpp } \pi \rightarrow \pi^*$                                                                                              |
|                                                                                                                  | 450                                      | 2.2                                                         | $\text{Ru}(\text{d}\pi) \rightarrow \text{Ph}_2\text{phen}(\pi^*)$ CT, $\text{Ru}(\text{d}\pi) \rightarrow \text{bpy}(\pi^*)$ CT |
|                                                                                                                  | 580                                      | 1.9                                                         | $\text{Ru}(\text{d}\pi) \rightarrow \text{dpp}(\pi^*)$ CT                                                                        |
| $[(\text{Ph}_2\text{phen})_2\text{Ru}(\text{dpp})\text{Ru}(\text{bpy})(\text{dpp})](\text{PF}_6)_4$              | 278                                      | 14                                                          | $\text{Ph}_2\text{phen } \pi \rightarrow \pi^*$ , $\text{bpy } \pi \rightarrow \pi^*$                                            |
|                                                                                                                  | 322 (sh)                                 | 5.8                                                         | $\text{dpp } \pi \rightarrow \pi^*$                                                                                              |
|                                                                                                                  | 436                                      | 3.0                                                         | $\text{Ru}(\text{d}\pi) \rightarrow \text{Ph}_2\text{phen}(\pi^*)$ CT, $\text{Ru}(\text{d}\pi) \rightarrow \text{bpy}(\pi^*)$ CT |
|                                                                                                                  | 535                                      | 2.8                                                         | $\text{Ru}(\text{d}\pi) \rightarrow \text{dpp}(\pi^*)$ CT                                                                        |
| $[(\text{Ph}_2\text{phen})_2\text{Ru}(\text{dpp})\text{Ru}(\text{bpy})(\text{dpq})](\text{PF}_6)_4$              | 278                                      | 14                                                          | $\text{Ph}_2\text{phen } \pi \rightarrow \pi^*$ , $\text{bpy } \pi \rightarrow \pi^*$                                            |
|                                                                                                                  | 328 (sh)                                 | 4.8                                                         | $\text{dpp } \pi \rightarrow \pi^*$ , $\text{dpq } \pi \rightarrow \pi^*$                                                        |
|                                                                                                                  | 436                                      | 2.4                                                         | $\text{Ru}(\text{d}\pi) \rightarrow \text{Ph}_2\text{phen}(\pi^*)$ CT, $\text{Ru}(\text{d}\pi) \rightarrow \text{bpy}(\pi^*)$ CT |
|                                                                                                                  | 545                                      | 2.3                                                         | $\text{Ru}(\text{d}\pi) \rightarrow \text{dpp}(\pi^*)$ CT, $\text{Ru}(\text{d}\pi) \rightarrow \text{dpq}(\pi^*)$ CT             |
| $[(\text{Ph}_2\text{phen})_2\text{Ru}(\text{dpp})\text{Ru}(\text{bpy})(\text{dpp})\text{PtCl}_2](\text{PF}_6)_4$ | 277                                      | 11                                                          | $\text{Ph}_2\text{phen } \pi \rightarrow \pi^*$ , $\text{bpy } \pi \rightarrow \pi^*$                                            |
|                                                                                                                  | 323 (sh)                                 | 5.6                                                         | $\text{dpp } \pi \rightarrow \pi^*$                                                                                              |
|                                                                                                                  | 434                                      | 2.8                                                         | $\text{Ru}(\text{d}\pi) \rightarrow \text{Ph}_2\text{phen}(\pi^*)$ CT, $\text{Ru}(\text{d}\pi) \rightarrow \text{bpy}(\pi^*)$ CT |
|                                                                                                                  | 542                                      | 2.9                                                         | $\text{Ru}(\text{d}\pi) \rightarrow \text{dpp}(\pi^*)$ CT                                                                        |
| $[(\text{Ph}_2\text{phen})_2\text{Ru}(\text{dpp})\text{Ru}(\text{bpy})(\text{dpq})\text{PtCl}_2](\text{PF}_6)_4$ | 277                                      | 12                                                          | $\text{Ph}_2\text{phen } \pi \rightarrow \pi^*$ , $\text{bpy } \pi \rightarrow \pi^*$                                            |
|                                                                                                                  | 326 (sh)                                 | 5.1                                                         | $\text{dpp } \pi \rightarrow \pi^*$ , $\text{dpq } \pi \rightarrow \pi^*$                                                        |
|                                                                                                                  | 434                                      | 2.4                                                         | $\text{Ru}(\text{d}\pi) \rightarrow \text{Ph}_2\text{phen}(\pi^*)$ CT, $\text{Ru}(\text{d}\pi) \rightarrow \text{bpy}(\pi^*)$ CT |
|                                                                                                                  | 543                                      | 2.2                                                         | $\text{Ru}(\text{d}\pi) \rightarrow \text{dpp}(\pi^*)$ CT, $\text{Ru}(\text{d}\pi) \rightarrow \text{dpq}(\pi^*)$ CT             |
| $[\{(\text{Ph}_2\text{phen})_2\text{Ru}(\text{dpp})\}_2\text{RuCl}_2](\text{PF}_6)_4$                            | 276                                      | 21                                                          | $\text{Ph}_2\text{phen } \pi \rightarrow \pi^*$                                                                                  |
|                                                                                                                  | 315 (sh)                                 | 9.1                                                         | $\text{dpp } \pi \rightarrow \pi^*$                                                                                              |
|                                                                                                                  | 442                                      | 4.5                                                         | $\text{Ru}(\text{d}\pi) \rightarrow \text{Ph}_2\text{phen}(\pi^*)$ CT                                                            |
|                                                                                                                  | 625                                      | 3.4                                                         | $\text{Ru}(\text{d}\pi) \rightarrow \text{dpp}(\pi^*)$ CT                                                                        |
| $[\{(\text{Ph}_2\text{phen})_2\text{Ru}(\text{dpp})\}_2\text{Ru}(\text{dpp})](\text{PF}_6)_6$                    | 276                                      | 20                                                          | $\text{Ph}_2\text{phen } \pi \rightarrow \pi^*$                                                                                  |
|                                                                                                                  | 340 (sh)                                 | 5.7                                                         | $\text{dpp } \pi \rightarrow \pi^*$                                                                                              |
|                                                                                                                  | 432                                      | 4.2                                                         | $\text{Ru}(\text{d}\pi) \rightarrow \text{Ph}_2\text{phen}(\pi^*)$ CT                                                            |
|                                                                                                                  | 554                                      | 4.2                                                         | $\text{Ru}(\text{d}\pi) \rightarrow \text{dpp}(\pi^*)$ CT                                                                        |
| $[\{(\text{Ph}_2\text{phen})_2\text{Ru}(\text{dpp})\}_2\text{Ru}(\text{dpq})](\text{PF}_6)_6$                    | 276                                      | 14                                                          | $\text{Ph}_2\text{phen } \pi \rightarrow \pi^*$                                                                                  |
|                                                                                                                  | 340 (sh)                                 | 5.5                                                         | $\text{dpp } \pi \rightarrow \pi^*$ , $\text{dpq } \pi \rightarrow \pi^*$                                                        |
|                                                                                                                  | 430                                      | 3.6                                                         | $\text{Ru}(\text{d}\pi) \rightarrow \text{Ph}_2\text{phen}(\pi^*)$ CT                                                            |
|                                                                                                                  | 550                                      | 3.6                                                         | $\text{Ru}(\text{d}\pi) \rightarrow \text{dpp}(\pi^*)$ CT, $\text{Ru}(\text{d}\pi) \rightarrow \text{dpq}(\pi^*)$ CT             |
| $[\{(\text{Ph}_2\text{phen})_2\text{Ru}(\text{dpp})\}_2\text{Ru}(\text{dpp})\text{PtCl}_2](\text{PF}_6)_6$       | 276                                      | 17                                                          | $\text{Ph}_2\text{phen } \pi \rightarrow \pi^*$                                                                                  |
|                                                                                                                  | 326 (sh)                                 | 7.7                                                         | $\text{dpp } \pi \rightarrow \pi^*$                                                                                              |
|                                                                                                                  | 432                                      | 4.2                                                         | $\text{Ru}(\text{d}\pi) \rightarrow \text{Ph}_2\text{phen}(\pi^*)$ CT                                                            |
|                                                                                                                  | 550                                      | 4.2                                                         | $\text{Ru}(\text{d}\pi) \rightarrow \text{dpp}(\pi^*)$ CT                                                                        |
| $[\{(\text{Ph}_2\text{phen})_2\text{Ru}(\text{dpp})\}_2\text{Ru}(\text{dpq})\text{PtCl}_2](\text{PF}_6)_6$       | 276                                      | 14                                                          | $\text{Ph}_2\text{phen } \pi \rightarrow \pi^*$                                                                                  |
|                                                                                                                  | 340 (sh)                                 | 5.2                                                         | $\text{dpp } \pi \rightarrow \pi^*$ , $\text{dpq } \pi \rightarrow \pi^*$                                                        |
|                                                                                                                  | 430                                      | 3.6                                                         | $\text{Ru}(\text{d}\pi) \rightarrow \text{Ph}_2\text{phen}(\pi^*)$ CT                                                            |
|                                                                                                                  | 550                                      | 3.1                                                         | $\text{Ru}(\text{d}\pi) \rightarrow \text{dpp}(\pi^*)$ CT, $\text{Ru}(\text{d}\pi) \rightarrow \text{dpq}(\pi^*)$ CT             |

<sup>a</sup> Measurements recorded in spectral grade  $\text{CH}_3\text{CN}$  at RT in a 1 cm quartz cuvette.  $\text{Ph}_2\text{phen}$  = 4,7-diphenyl-1,10-phenanthroline,  $\text{bpy}$  = 2,2'-bipyridine,  $\text{dpp}$  = 2,3-bis(2-pyridyl)pyrazine,  $\text{dpq}$  = 2,3-bis(2-pyridyl)quinoxaline. Extinction coefficient values were determined from the average of three experiments.

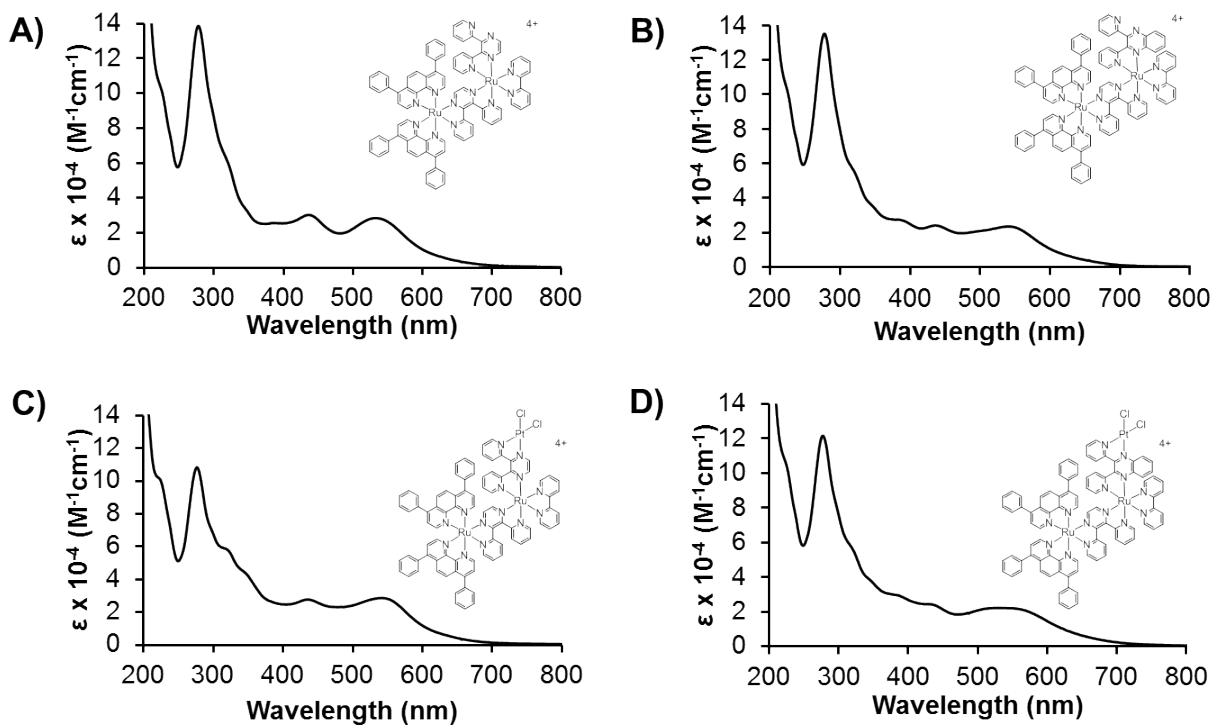

**Figure S2.** Electronic absorption spectra of A)  $[(\text{Ph}_2\text{phen})_2\text{Ru}(\text{dpp})\text{Ru}(\text{bpy})(\text{dpp})](\text{PF}_6)_4$ , B)  $[(\text{Ph}_2\text{phen})_2\text{Ru}(\text{dpp})\text{Ru}(\text{bpy})(\text{dpq})](\text{PF}_6)_4$ , C)  $[(\text{Ph}_2\text{phen})_2\text{Ru}(\text{dpp})\text{Ru}(\text{bpy})(\text{dpp})\text{PtCl}_2](\text{PF}_6)_4$ , and D)  $[(\text{Ph}_2\text{phen})_2\text{Ru}(\text{dpp})\text{Ru}(\text{bpy})(\text{dpq})\text{PtCl}_2](\text{PF}_6)_4$  measured in RT  $\text{CH}_3\text{CN}$ .

## EMISSION SPECTROSCOPY

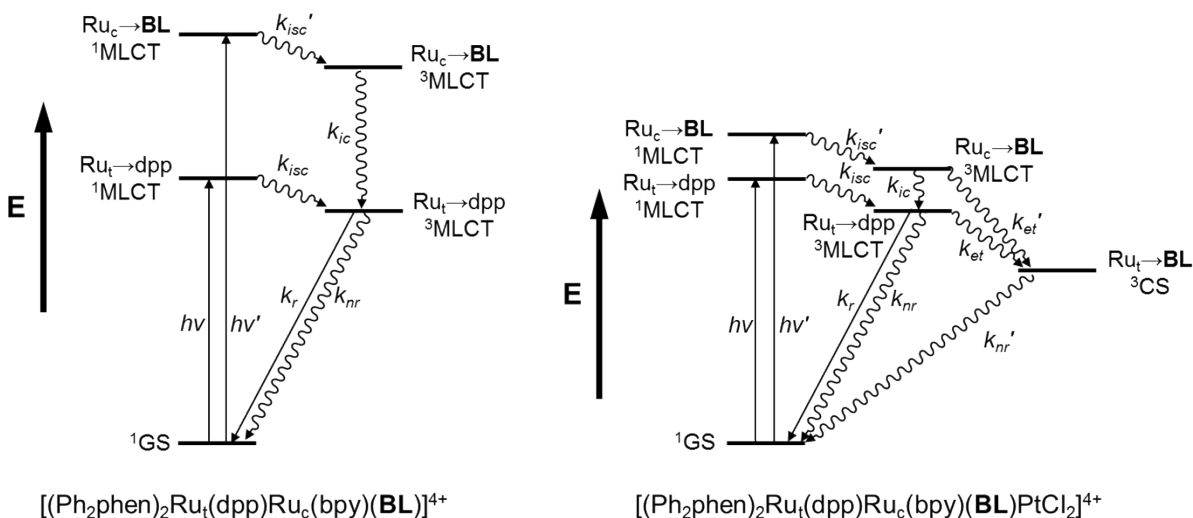

**Figure S3.** Simplified state diagrams for  $[(\text{Ph}_2\text{phen})_2\text{Ru}(\text{dpp})\text{Ru}(\text{bpy})(\text{BL})](\text{PF}_6)_4$  and  $[(\text{Ph}_2\text{phen})_2\text{Ru}(\text{dpp})\text{Ru}(\text{bpy})(\text{BL})\text{PtCl}_2](\text{PF}_6)_4$ . BL = dpp = 2,3-bis(2-pyridyl)pyrazine or dpq = 2,3-bis(2-pyridyl)quinoxaline,  $\text{Ph}_2\text{phen}$  = 4,7-diphenyl-1,10-phenanthroline, bpy = 2,2'-bipyridine,  $^1\text{MLCT}$  = singlet metal-to-ligand charge transfer,  $^3\text{MLCT}$  = triplet metal-to-ligand charge transfer,  $^3\text{CS}$  = triplet charge separated state,  $k_r$  = rate constant for radiative decay,  $k_{nr}$  = rate constant for non-radiative decay,  $k_{isc}$  = rate constant for intersystem crossing,  $k_{ic}$  = rate constant for internal conversion,  $k_{et}$  = rate constant for electron transfer.

**Table S3.** Steady-State and Time-Resolved Emission Spectroscopy Data for the  $[(\text{Ph}_2\text{phen})_2\text{Ru}(\text{dpp})\text{Ru}(\text{bpy})(\text{BL})](\text{PF}_6)_4$ ,  $[(\text{Ph}_2\text{phen})_2\text{Ru}(\text{dpp})\text{Ru}(\text{bpy})(\text{BL})\text{PtCl}_2](\text{PF}_6)_4$ ,  $[(\text{Ph}_2\text{phen})_2\text{Ru}(\text{dpp})\text{Ru}(\text{BL})](\text{PF}_6)_6$ , and  $[(\text{Ph}_2\text{phen})_2\text{Ru}(\text{dpp})_2\text{Ru}(\text{BL})\text{PtCl}_2](\text{PF}_6)_6$  Complexes <sup>a</sup>

| Complex                                                                                                          | $\lambda_{\text{em}}$ (nm) | $\Phi_{\text{em}} \times 10^3$ | $\tau$ ( $\mu\text{s}$ ) | $\lambda_{\text{em}}$ (nm) |
|------------------------------------------------------------------------------------------------------------------|----------------------------|--------------------------------|--------------------------|----------------------------|
|                                                                                                                  | RT                         | RT                             | RT                       | 77 K <sup>b</sup>          |
| $[(\text{Ph}_2\text{phen})_2\text{Ru}(\text{dpp})\text{Ru}(\text{bpy})(\text{dpp})](\text{PF}_6)_4$              | 762                        | 1.5                            | 0.12                     | 695                        |
| $[(\text{Ph}_2\text{phen})_2\text{Ru}(\text{dpp})\text{Ru}(\text{bpy})(\text{dpq})](\text{PF}_6)_4$              | 762                        | 1.5                            | 0.12                     | 706                        |
| $[(\text{Ph}_2\text{phen})_2\text{Ru}(\text{dpp})\text{Ru}(\text{bpy})(\text{dpp})\text{PtCl}_2](\text{PF}_6)_4$ | 765                        | 1.1                            | 0.090                    | 705                        |
| $[(\text{Ph}_2\text{phen})_2\text{Ru}(\text{dpp})\text{Ru}(\text{bpy})(\text{dpq})\text{PtCl}_2](\text{PF}_6)_4$ | 761                        | 0.52                           | 0.10                     | 706                        |
| $[(\text{Ph}_2\text{phen})_2\text{Ru}(\text{dpp})_2\text{Ru}(\text{dpp})](\text{PF}_6)_6$                        | 764                        | 1.0                            | 0.11                     | 705                        |
| $[(\text{Ph}_2\text{phen})_2\text{Ru}(\text{dpp})_2\text{Ru}(\text{dpq})](\text{PF}_6)_6$                        | 764                        | 1.1                            | 0.11                     | 715                        |
| $[(\text{Ph}_2\text{phen})_2\text{Ru}(\text{dpp})_2\text{Ru}(\text{dpp})\text{PtCl}_2](\text{PF}_6)_6$           | 766                        | 0.71                           | 0.077                    | 705                        |
| $[(\text{Ph}_2\text{phen})_2\text{Ru}(\text{dpp})_2\text{Ru}(\text{dpq})\text{PtCl}_2](\text{PF}_6)_6$           | 760                        | 0.37                           | 0.075                    | 715                        |

<sup>a</sup> RT measurements were performed on  $\text{CH}_3\text{CN}$  solutions deoxygenated with Ar and excited at 540 nm. Values corrected for PMT response.  $\text{Ph}_2\text{phen}$  = 4,7-diphenyl-1,10-phenanthroline, bpy = 2,2'-bipyridine, dpp = 2,3-bis(2-pyridyl)pyrazine, dpq = 2,3-bis(2-pyridyl)quinoxaline. <sup>b</sup> 77 K measurements were performed with complexes in a 4:1 (v/v) EtOH/MeOH glass and excited at 540 nm.

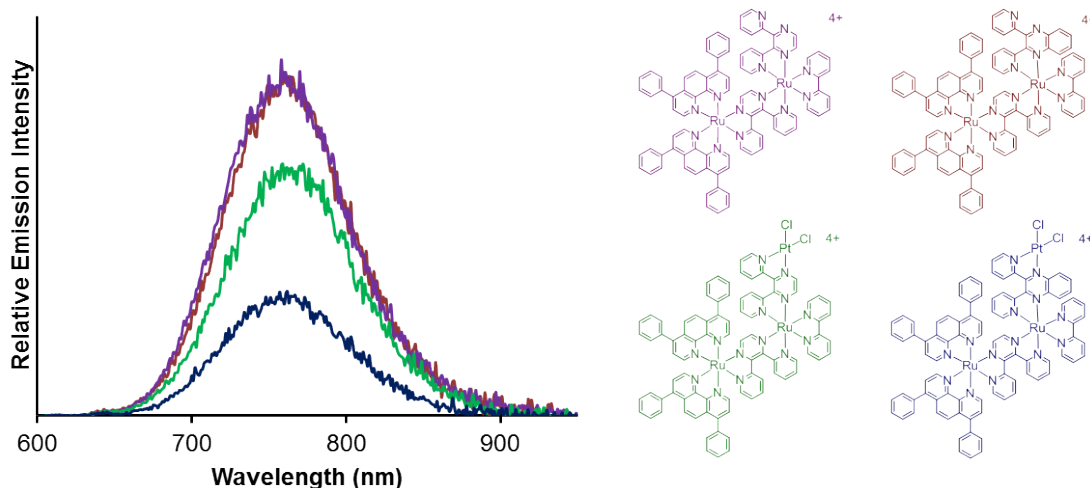

**Figure S4.** Relative steady-state emission spectra of  $[(\text{Ph}_2\text{phen})_2\text{Ru}(\text{dpp})\text{Ru}(\text{bpy})(\text{dpp})](\text{PF}_6)_4$  (purple),  $[(\text{Ph}_2\text{phen})_2\text{Ru}(\text{dpp})\text{Ru}(\text{bpy})(\text{dpq})](\text{PF}_6)_4$  (maroon),  $[(\text{Ph}_2\text{phen})_2\text{Ru}(\text{dpp})\text{Ru}(\text{bpy})(\text{dpp})\text{PtCl}_2](\text{PF}_6)_4$  (green), and  $[(\text{Ph}_2\text{phen})_2\text{Ru}(\text{dpp})\text{Ru}(\text{bpy})(\text{dpq})\text{PtCl}_2](\text{PF}_6)_4$  (blue) measured in deoxygenated RT  $\text{CH}_3\text{CN}$  with  $\lambda^{\text{exc}} = 540$  nm. Spectra were corrected for PMT response.

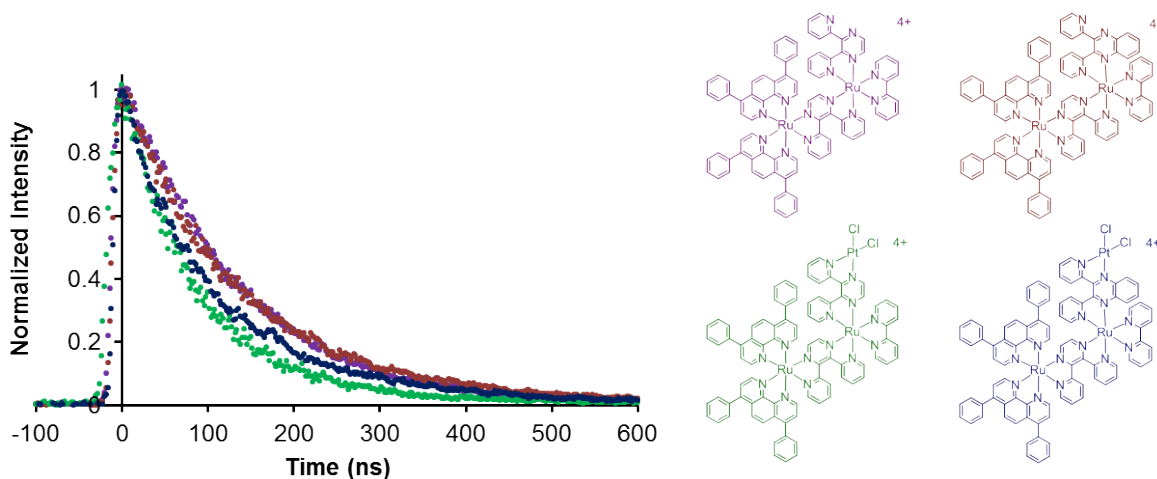

**Figure S5.** Normalized emission decay curves of  $[(\text{Ph}_2\text{phen})_2\text{Ru}(\text{dpp})\text{Ru}(\text{bpy})(\text{dpp})](\text{PF}_6)_4$  (purple),  $[(\text{Ph}_2\text{phen})_2\text{Ru}(\text{dpp})\text{Ru}(\text{bpy})(\text{dpq})](\text{PF}_6)_4$  (maroon),  $[(\text{Ph}_2\text{phen})_2\text{Ru}(\text{dpp})\text{Ru}(\text{bpy})(\text{dpp})\text{PtCl}_2](\text{PF}_6)_4$  (green), and  $[(\text{Ph}_2\text{phen})_2\text{Ru}(\text{dpp})\text{Ru}(\text{bpy})(\text{dpq})\text{PtCl}_2](\text{PF}_6)_4$  (blue) measured in deoxygenated RT  $\text{CH}_3\text{CN}$  with  $\lambda^{\text{exc}} = 540$  nm.

$$\tau_{\text{model}} = \frac{1}{k_r + k_{nr}} \quad (\text{S4})$$

$$\tau_{\text{tetrametallic}} = \frac{1}{k_r + k_{nr} + k_{et}} \quad (\text{S5})$$

$$\Phi_{3MLCT}^{em(model)} = \Phi_{3MLCT}^{pop(model)} \left( \frac{k_r}{k_r + k_{nr}} \right) \quad (S6)$$

$$\Phi_{3MLCT}^{em(tetrametallic)} = \Phi_{3MLCT}^{pop(tetrametallic)} \left( \frac{k_r}{k_r + k_{nr} + k_{et}} \right) \quad (S7)$$

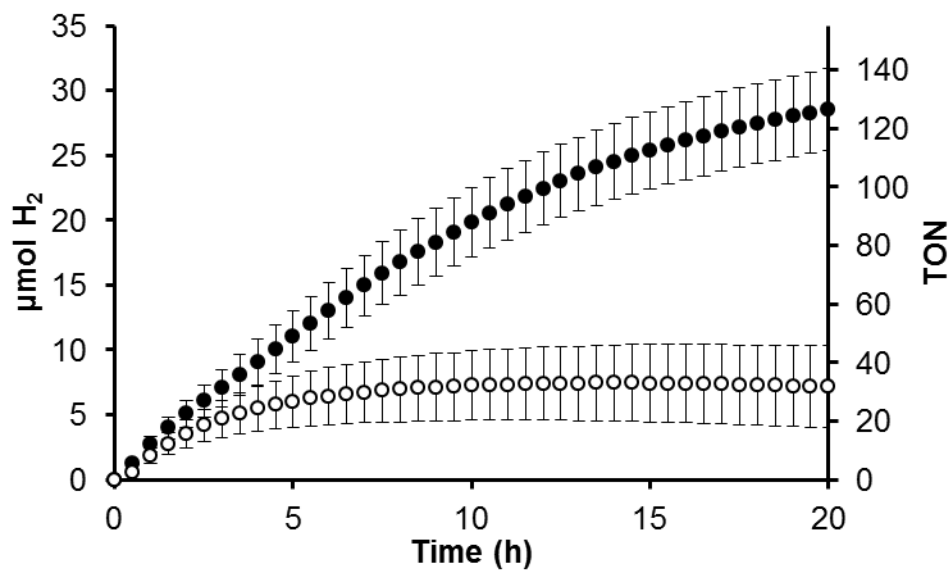

**Figure S6.** Photocatalytic H<sub>2</sub> production with **RuRudppPt** (black circles) and **Ru<sub>2</sub>RudppPt** (white circles) with 50 μM catalyst in spectral grade CH<sub>3</sub>CN, 0.62 M H<sub>2</sub>O, 1.5 M DMA, and 110 μM [DMAH<sup>+</sup>][SO<sub>3</sub>CF<sub>3</sub><sup>-</sup>]. Solutions were irradiated with λ = 470 ± 10 nm.

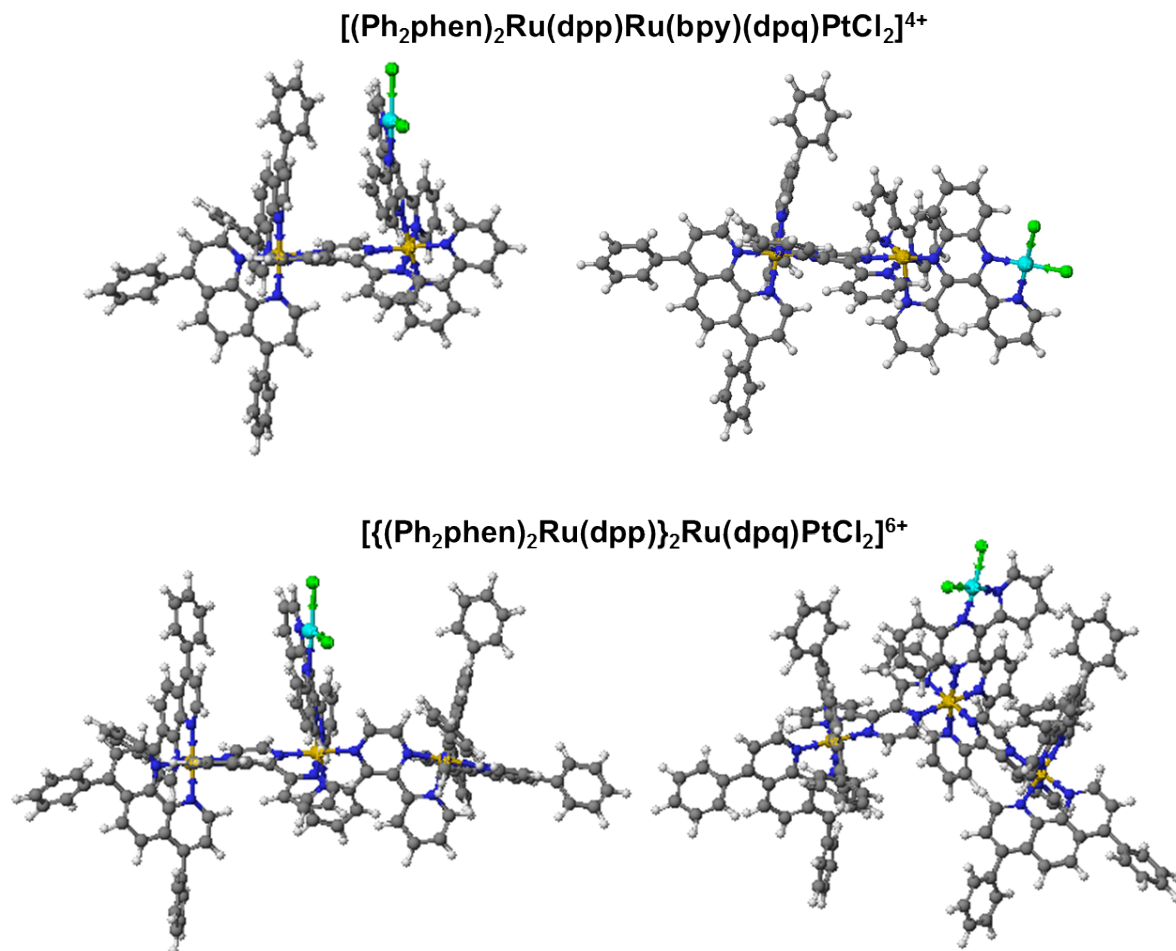

**Figure S7.** Three dimensional models of  $[(\text{Ph}_2\text{phen})_2\text{Ru}(\text{dpp})\text{Ru}(\text{bpy})(\text{dpq})\text{PtCl}_2]^{4+}$  (top) and  $[\{(\text{Ph}_2\text{phen})_2\text{Ru}(\text{dpp})\}_2\text{Ru}(\text{dpq})\text{PtCl}_2]^{6+}$  (bottom) showing the impact of isomerism on the sterics around the *cis*-PtCl<sub>2</sub> center. Structures generated and energy minimized using Scigress 7.7.1 molecular modeling software with the MM3 method. Gold = Ru, light blue = Pt, green = Cl, blue = N, gray = C, white = H, Ph<sub>2</sub>phen = 4,7-diphenyl-1,10-phenanthroline, bpy = 2,2'-bipyridine, dpp = 2,3-bis(2-pyridyl)pyrazine, dpq = 2,3-bis(2-pyridyl)quinoxaline.

## REFERENCES

- [1] a) H. A. Goodwin and F. Lions, *Journal of the American Chemical Society* **1959**, *81*, 6415-6422; b) J. H. Price, A. N. Williamson, R. F. Schramm and B. B. Wayland, *Inorganic Chemistry* **1972**, *11*, 1280-1284; c) M. T. Mongelli and K. J. Brewer, *Inorganic Chemistry Communications* **2006**, *9*, 877-881; d) M. Toyama, K.-I. Inoue, S. Iwamatsu and N. Nagao, *Bulletin of the Chemical Society of Japan* **2006**, *79*, 1525-1534.
- [2] M. Winter in *Sheffield Chemputer*, Vol. **1993-2001**.
- [3] J. V. Caspar, E. M. Kober, B. P. Sullivan and T. J. Meyer, *Journal of the American Chemical Society* **1982**, *104*, 630-632.

[4] J. R. Brown, M. Elvington, M. T. Mongelli, D. F. Zigler and K. J. Brewer, *SPIE Optics+ Photonics*, **2006**, p. 634017.
